# Supplementary material for: Heterosis analysis and underlying molecular regulatory mechanism in a wide-compatible neo-tetraploid rice line with long panicles
Source: PubMed Central journal article supplement (PMC7035737; doi:10.1186/s12870-020-2291-z), 2020-02-21
Supplement: 12870_2020_2291_MOESM1_ESM.pdf [file 12870_2020_2291_MOESM1_ESM.pdf]

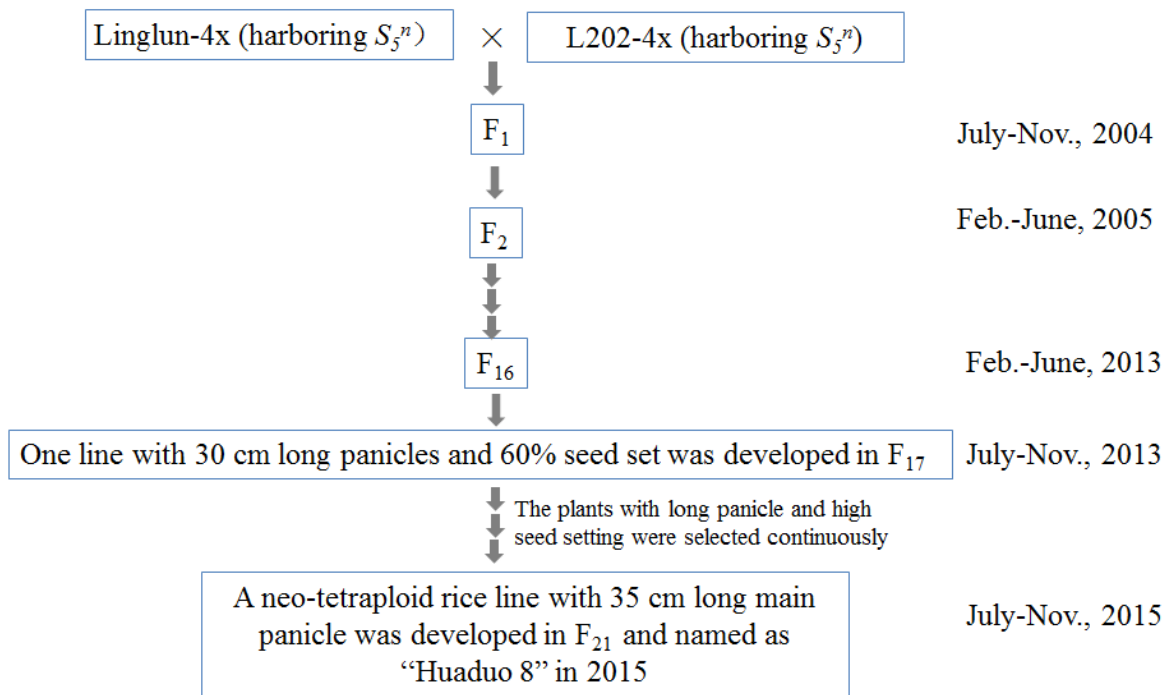

Fig. S1a. Breeding procedure of Huaduo 8

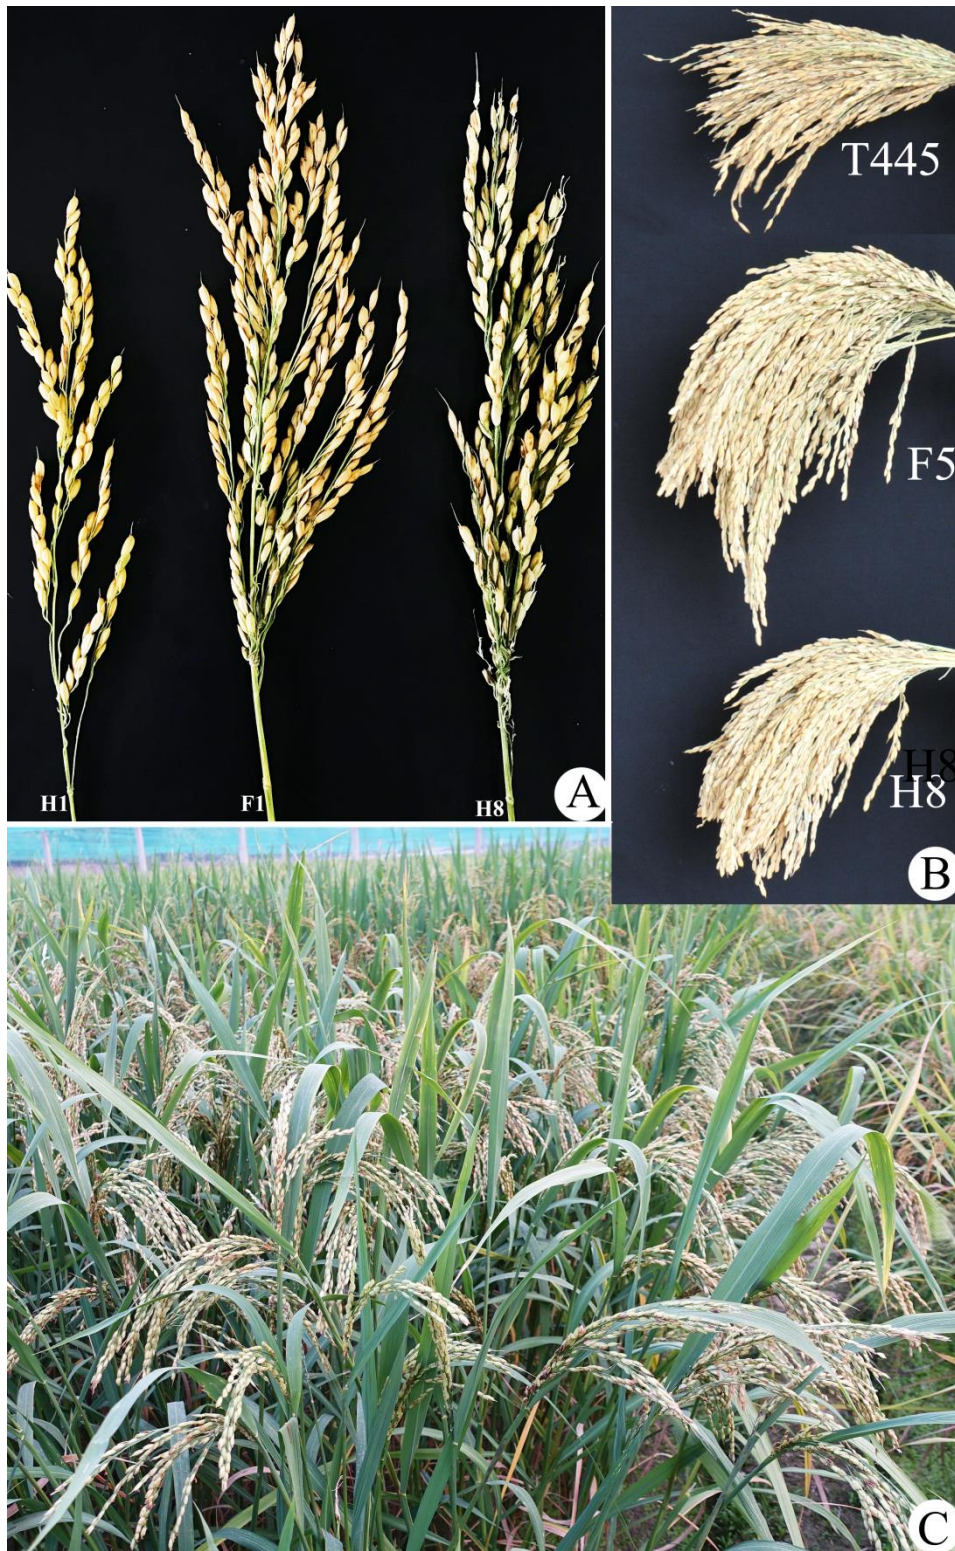

Fig. S1b Panicles of Huaduo 1 (H1), Huaduo 8 (H8) and their hybrid

A: Panicles of Huaduo 1 (H1), Huaduo 8 (H8) and their F<sub>1</sub> hybrid (F<sub>1</sub>); B: Panicles of Luxiang 97-4x (T445, An autotetraploid rice), Huaduo 8 (H8) and their F<sub>5</sub> generation with high fertility; C: Panicles of Huaduo 3 × Huaduo 8 in F<sub>3</sub> generation

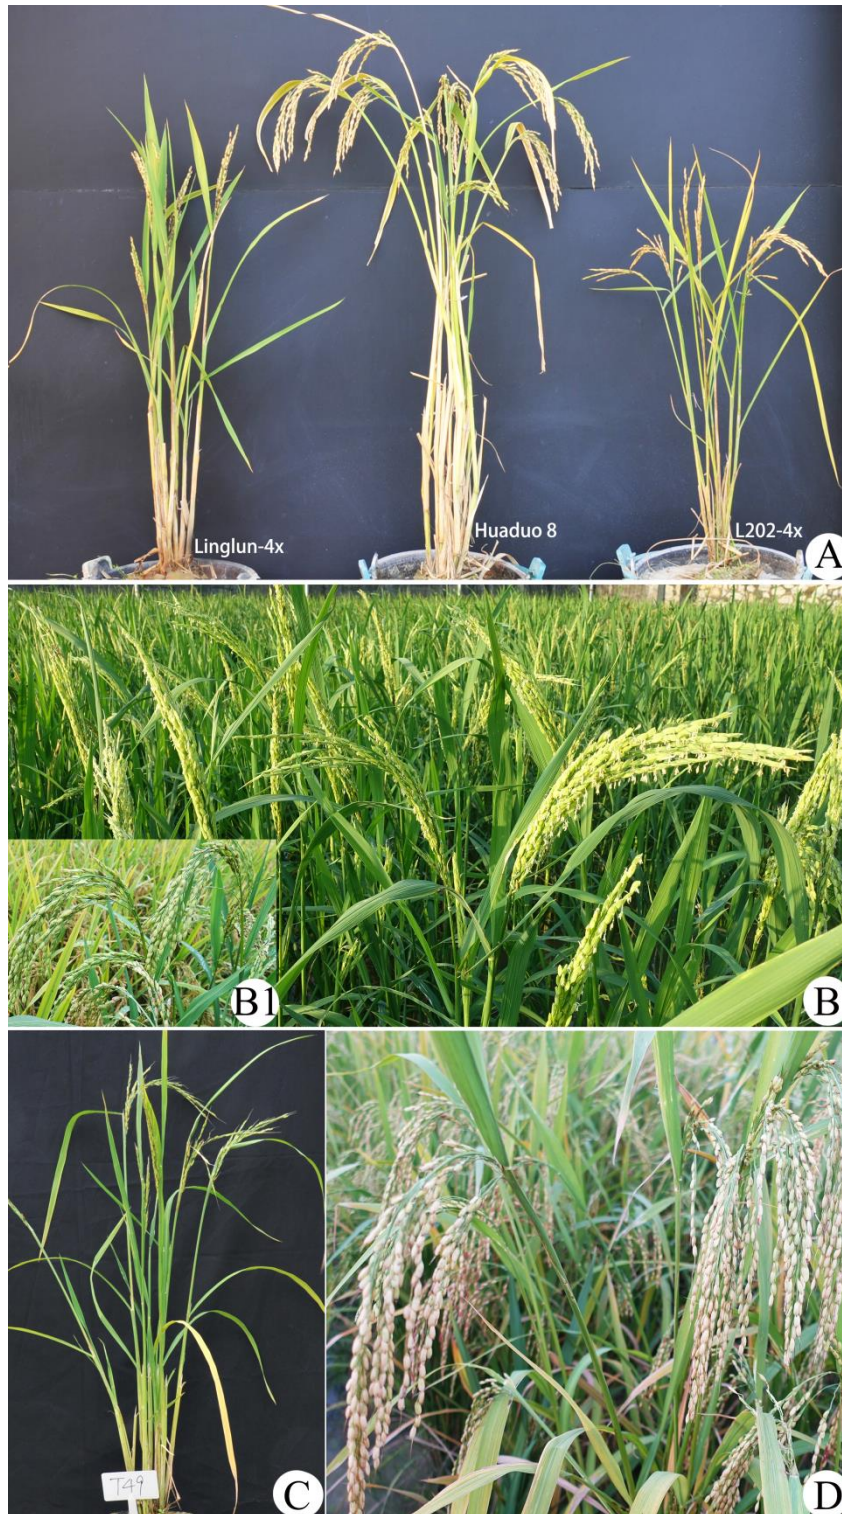

Fig. S1c Plant appearance of parents and F<sub>1</sub> hybrid generated by crossing with Huaduo 8 (H8)

[A: Linglun-4x (T428), Huaduo 8 (H8) and L202-4x (T43); B: Huaduo 8 at flowering stage, B1: Huaduo 8 at 15 days after flowering; C: Bengal-4x (T49, an autotetraploid rice with low fertility); D: F<sub>1</sub> of Bengal-4x × Huaduo 8]

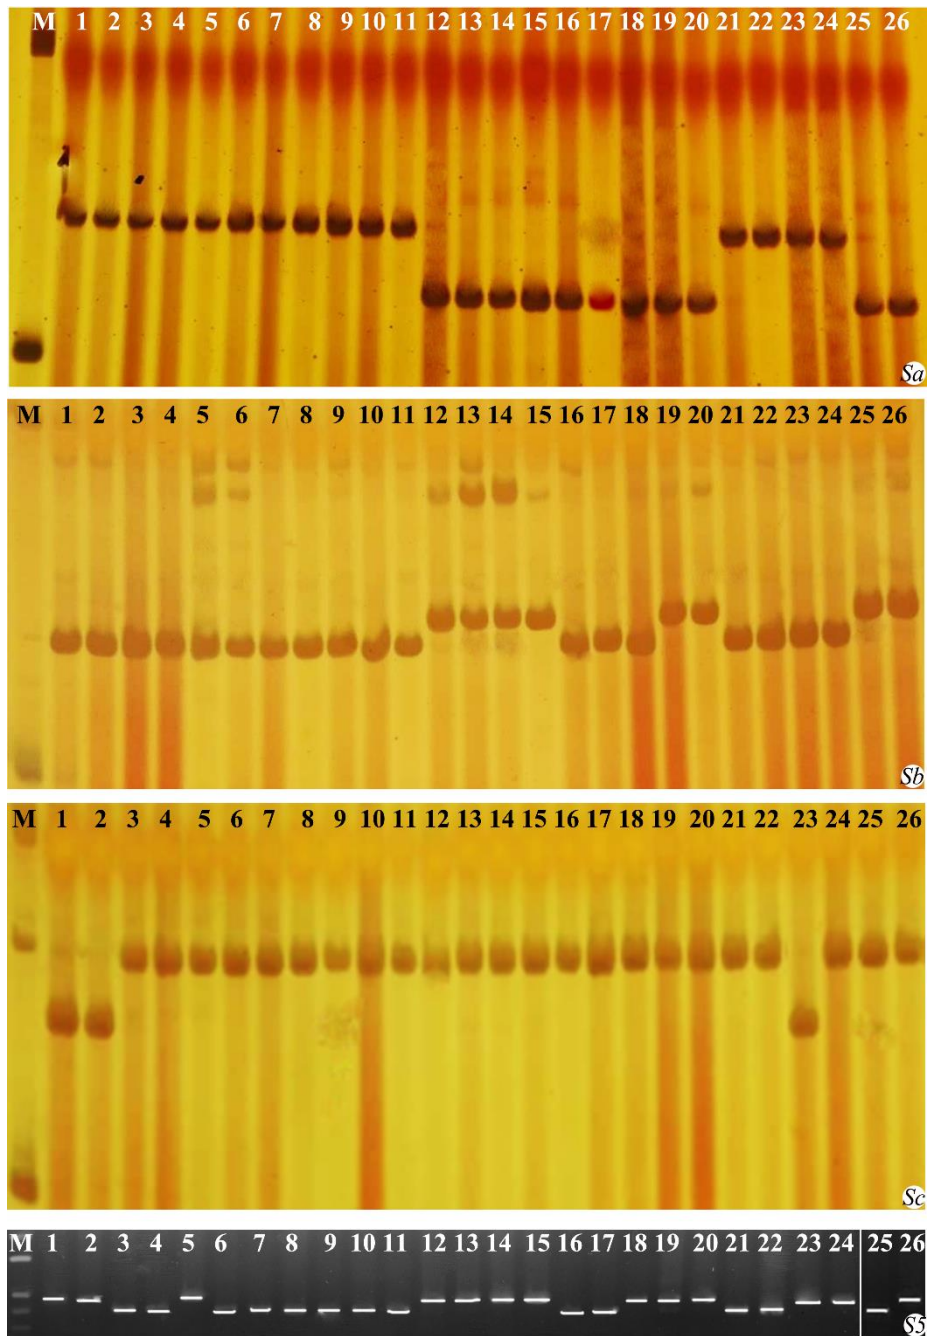

Fig. S2 Original images of genotypes of parental lines at pollen sterility loci (*Sa*, *Sb* and *Sc*) and *S5* locus detected by molecular markers.

First image indicates the genotypes at *Sa* locus, followed by (upper to lower) *Sb*, *Sc* and *S5* locus. M indicates DNA ladder, lanes 1-4 indicate control cultivars (typical *indica* and *japonica* cultivars), while lanes 5-26 indicate neo-tetraploid/autotetraploid rice lines (see the name of materials in Additional file 2: Table S1). Lanes 25 and 26 in *S5* were taken from another gel.

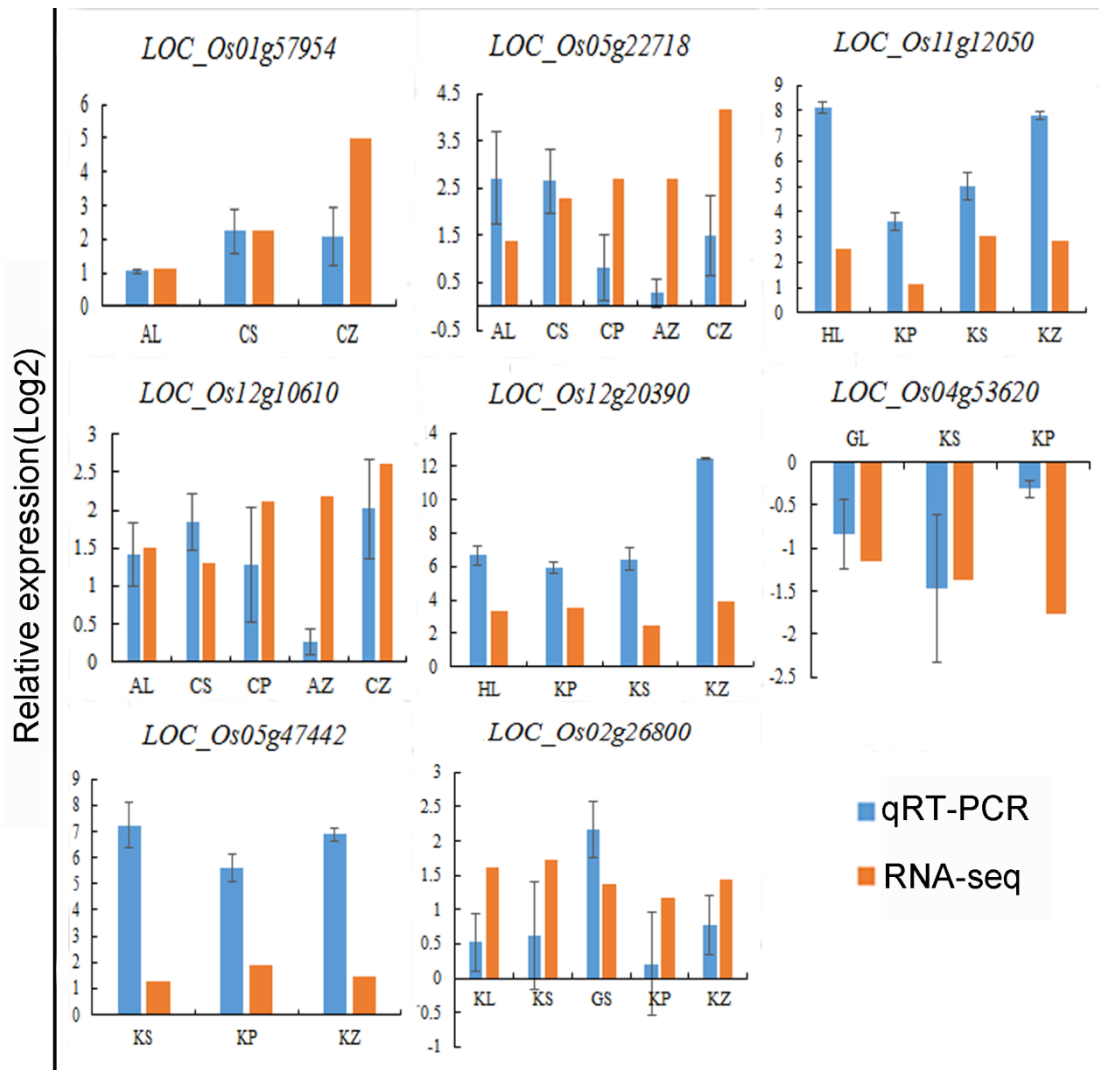

Fig. S3 qRT-PCR validation of the important genes detected in the present study (Codes of all X-axis are listed in Additional file 2: Table S4a)



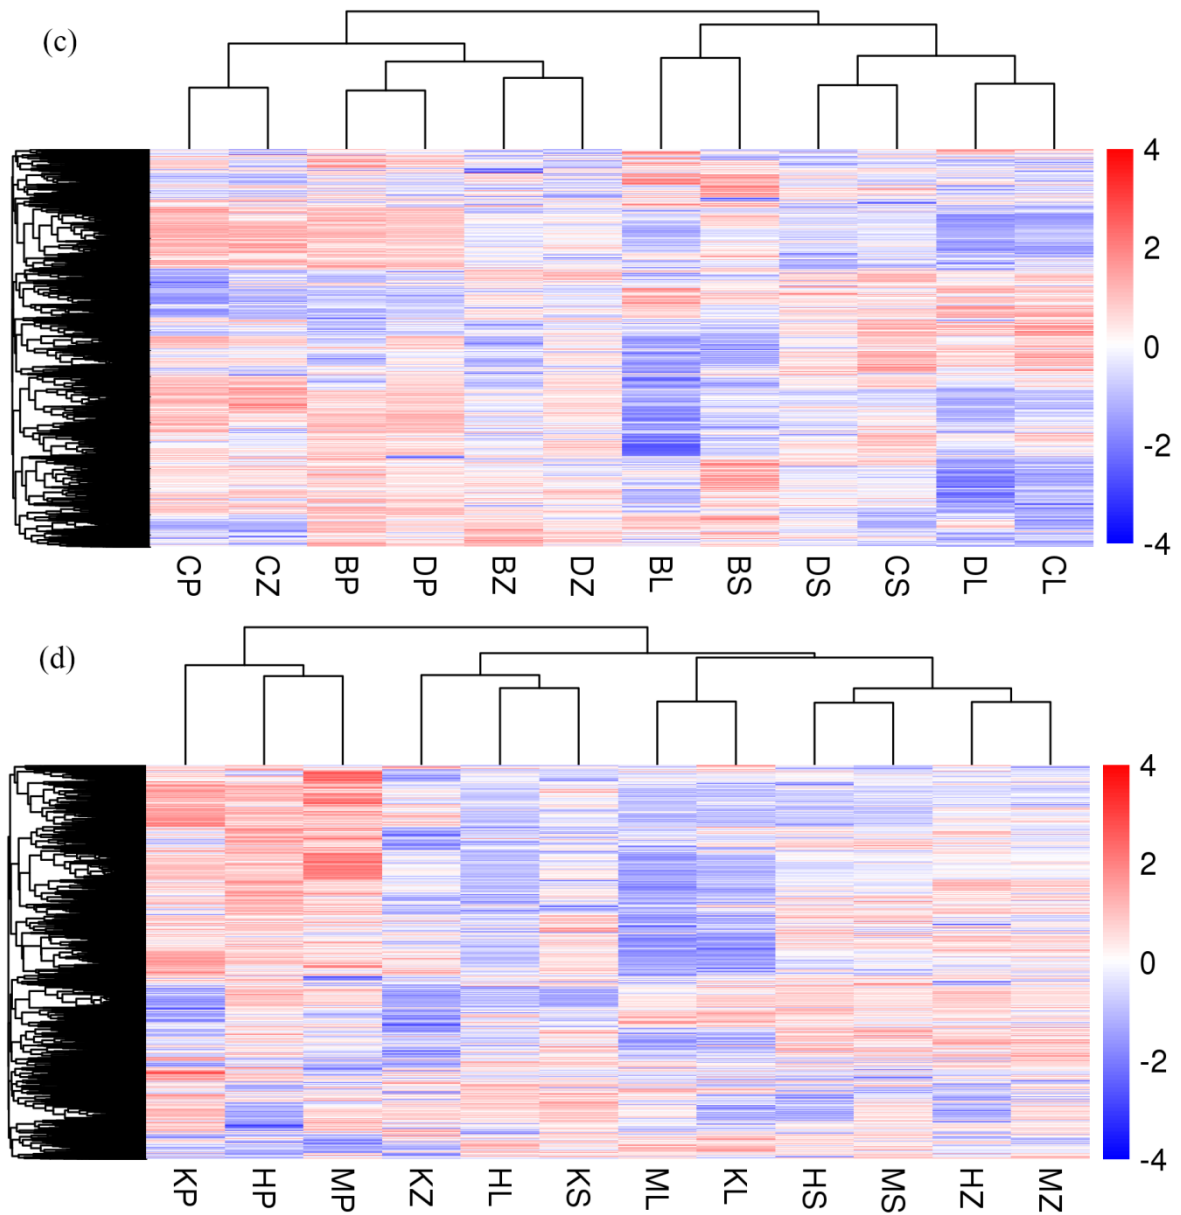

Fig. S4. Hierarchical clustering analysis of all expressed genes in F<sub>1</sub> hybrid and their parents based on transcriptome data

(a): F<sub>1</sub> hybrid (H1×H8) and its parents before flowering; (b): F<sub>1</sub> hybrid (H1×H8) and its parents 5 days after flowering; (c): F<sub>1</sub> hybrid (T485×H8) and its parents before flowering; (d) F<sub>1</sub> hybrid (T485×H8) and its parents 5 days after flowering. Codes of all X-axis are listed in Additional file 2: Table S4a

| Hybrids                      | (H1xH8)F <sub>1</sub> |                |                |                |                |                |                |                | (T485xH8)F <sub>1</sub> |                |                |                |                |                |                |                |  |
|------------------------------|-----------------------|----------------|----------------|----------------|----------------|----------------|----------------|----------------|-------------------------|----------------|----------------|----------------|----------------|----------------|----------------|----------------|--|
|                              | L <sub>0</sub>        | S <sub>0</sub> | P <sub>0</sub> | Z <sub>0</sub> | L <sub>5</sub> | S <sub>5</sub> | P <sub>5</sub> | Z <sub>5</sub> | L <sub>0</sub>          | S <sub>0</sub> | P <sub>0</sub> | Z <sub>0</sub> | L <sub>5</sub> | S <sub>5</sub> | P <sub>5</sub> | Z <sub>5</sub> |  |
| <b>A. Biological process</b> |                       |                |                |                |                |                |                |                |                         |                |                |                |                |                |                |                |  |
| GO:0055114                   |                       |                |                |                |                |                |                |                |                         |                |                |                |                |                |                |                |  |
| GO:0005975                   |                       |                |                |                |                |                |                |                |                         |                |                |                |                |                |                |                |  |
| GO:0044267                   |                       |                |                |                |                |                |                |                |                         |                |                |                |                |                |                |                |  |
| GO:0016310                   |                       |                |                |                |                |                |                |                |                         |                |                |                |                |                |                |                |  |
| GO:0006796                   |                       |                |                |                |                |                |                |                |                         |                |                |                |                |                |                |                |  |
| GO:0006793                   |                       |                |                |                |                |                |                |                |                         |                |                |                |                |                |                |                |  |
| GO:0058007                   |                       |                |                |                |                |                |                |                |                         |                |                |                |                |                |                |                |  |
| GO:0043687                   |                       |                |                |                |                |                |                |                |                         |                |                |                |                |                |                |                |  |
| GO:0006464                   |                       |                |                |                |                |                |                |                |                         |                |                |                |                |                |                |                |  |
| GO:0043412                   |                       |                |                |                |                |                |                |                |                         |                |                |                |                |                |                |                |  |
| GO:0006468                   |                       |                |                |                |                |                |                |                |                         |                |                |                |                |                |                |                |  |
| GO:0050794                   |                       |                |                |                |                |                |                |                |                         |                |                |                |                |                |                |                |  |
| GO:0010467                   |                       |                |                |                |                |                |                |                |                         |                |                |                |                |                |                |                |  |
| GO:0050789                   |                       |                |                |                |                |                |                |                |                         |                |                |                |                |                |                |                |  |
| GO:0006350                   |                       |                |                |                |                |                |                |                |                         |                |                |                |                |                |                |                |  |
| GO:0044262                   |                       |                |                |                |                |                |                |                |                         |                |                |                |                |                |                |                |  |
| GO:0006810                   |                       |                |                |                |                |                |                |                |                         |                |                |                |                |                |                |                |  |
| GO:0051234                   |                       |                |                |                |                |                |                |                |                         |                |                |                |                |                |                |                |  |
| GO:0051179                   |                       |                |                |                |                |                |                |                |                         |                |                |                |                |                |                |                |  |
| GO:0043436                   |                       |                |                |                |                |                |                |                |                         |                |                |                |                |                |                |                |  |
| GO:0019752                   |                       |                |                |                |                |                |                |                |                         |                |                |                |                |                |                |                |  |
| GO:0006082                   |                       |                |                |                |                |                |                |                |                         |                |                |                |                |                |                |                |  |
| GO:0042180                   |                       |                |                |                |                |                |                |                |                         |                |                |                |                |                |                |                |  |
| GO:0009308                   |                       |                |                |                |                |                |                |                |                         |                |                |                |                |                |                |                |  |
| GO:0044281                   |                       |                |                |                |                |                |                |                |                         |                |                |                |                |                |                |                |  |
| GO:0015979                   |                       |                |                |                |                |                |                |                |                         |                |                |                |                |                |                |                |  |
| GO:0065004                   |                       |                |                |                |                |                |                |                |                         |                |                |                |                |                |                |                |  |
| GO:0006323                   |                       |                |                |                |                |                |                |                |                         |                |                |                |                |                |                |                |  |
| GO:0034728                   |                       |                |                |                |                |                |                |                |                         |                |                |                |                |                |                |                |  |
| GO:0065003                   |                       |                |                |                |                |                |                |                |                         |                |                |                |                |                |                |                |  |
| GO:0043933                   |                       |                |                |                |                |                |                |                |                         |                |                |                |                |                |                |                |  |
| GO:0019538                   |                       |                |                |                |                |                |                |                |                         |                |                |                |                |                |                |                |  |
| GO:0022607                   |                       |                |                |                |                |                |                |                |                         |                |                |                |                |                |                |                |  |
| GO:0006334                   |                       |                |                |                |                |                |                |                |                         |                |                |                |                |                |                |                |  |
| GO:0034631                   |                       |                |                |                |                |                |                |                |                         |                |                |                |                |                |                |                |  |
| GO:0046022                   |                       |                |                |                |                |                |                |                |                         |                |                |                |                |                |                |                |  |
| GO:0031497                   |                       |                |                |                |                |                |                |                |                         |                |                |                |                |                |                |                |  |
| GO:0071103                   |                       |                |                |                |                |                |                |                |                         |                |                |                |                |                |                |                |  |
| GO:0006412                   |                       |                |                |                |                |                |                |                |                         |                |                |                |                |                |                |                |  |
| GO:0031326                   |                       |                |                |                |                |                |                |                |                         |                |                |                |                |                |                |                |  |
| GO:0000900                   |                       |                |                |                |                |                |                |                |                         |                |                |                |                |                |                |                |  |
| GO:0009880                   |                       |                |                |                |                |                |                |                |                         |                |                |                |                |                |                |                |  |
| GO:0010468                   |                       |                |                |                |                |                |                |                |                         |                |                |                |                |                |                |                |  |
| GO:0045449                   |                       |                |                |                |                |                |                |                |                         |                |                |                |                |                |                |                |  |
| GO:0051171                   |                       |                |                |                |                |                |                |                |                         |                |                |                |                |                |                |                |  |
| GO:0060255                   |                       |                |                |                |                |                |                |                |                         |                |                |                |                |                |                |                |  |
| GO:0019219                   |                       |                |                |                |                |                |                |                |                         |                |                |                |                |                |                |                |  |
| GO:0031323                   |                       |                |                |                |                |                |                |                |                         |                |                |                |                |                |                |                |  |
| GO:0010556                   |                       |                |                |                |                |                |                |                |                         |                |                |                |                |                |                |                |  |
| GO:0019222                   |                       |                |                |                |                |                |                |                |                         |                |                |                |                |                |                |                |  |
| GO:0055085                   |                       |                |                |                |                |                |                |                |                         |                |                |                |                |                |                |                |  |
| GO:0006520                   |                       |                |                |                |                |                |                |                |                         |                |                |                |                |                |                |                |  |
| GO:0034641                   |                       |                |                |                |                |                |                |                |                         |                |                |                |                |                |                |                |  |
| GO:0005976                   |                       |                |                |                |                |                |                |                |                         |                |                |                |                |                |                |                |  |
| GO:0006519                   |                       |                |                |                |                |                |                |                |                         |                |                |                |                |                |                |                |  |
| GO:0009811                   |                       |                |                |                |                |                |                |                |                         |                |                |                |                |                |                |                |  |
| GO:0044106                   |                       |                |                |                |                |                |                |                |                         |                |                |                |                |                |                |                |  |
| GO:0006812                   |                       |                |                |                |                |                |                |                |                         |                |                |                |                |                |                |                |  |
| GO:0009607                   |                       |                |                |                |                |                |                |                |                         |                |                |                |                |                |                |                |  |
| GO:0016051                   |                       |                |                |                |                |                |                |                |                         |                |                |                |                |                |                |                |  |
| GO:0034637                   |                       |                |                |                |                |                |                |                |                         |                |                |                |                |                |                |                |  |
| GO:0046394                   |                       |                |                |                |                |                |                |                |                         |                |                |                |                |                |                |                |  |
| GO:0044283                   |                       |                |                |                |                |                |                |                |                         |                |                |                |                |                |                |                |  |
| GO:0044085                   |                       |                |                |                |                |                |                |                |                         |                |                |                |                |                |                |                |  |
| GO:0016053                   |                       |                |                |                |                |                |                |                |                         |                |                |                |                |                |                |                |  |
| GO:0034660                   |                       |                |                |                |                |                |                |                |                         |                |                |                |                |                |                |                |  |
| GO:0006457                   |                       |                |                |                |                |                |                |                |                         |                |                |                |                |                |                |                |  |
| <b>B. Molecular function</b> |                       |                |                |                |                |                |                |                |                         |                |                |                |                |                |                |                |  |
| GO:0016491                   |                       |                |                |                |                |                |                |                |                         |                |                |                |                |                |                |                |  |
| GO:0016773                   |                       |                |                |                |                |                |                |                |                         |                |                |                |                |                |                |                |  |
| GO:0004672                   |                       |                |                |                |                |                |                |                |                         |                |                |                |                |                |                |                |  |
| GO:0004674                   |                       |                |                |                |                |                |                |                |                         |                |                |                |                |                |                |                |  |
| GO:0016301                   |                       |                |                |                |                |                |                |                |                         |                |                |                |                |                |                |                |  |
| GO:0003554                   |                       |                |                |                |                |                |                |                |                         |                |                |                |                |                |                |                |  |
| GO:0001883                   |                       |                |                |                |                |                |                |                |                         |                |                |                |                |                |                |                |  |
| GO:0001882                   |                       |                |                |                |                |                |                |                |                         |                |                |                |                |                |                |                |  |
| GO:0000166                   |                       |                |                |                |                |                |                |                |                         |                |                |                |                |                |                |                |  |
| GO:0016798                   |                       |                |                |                |                |                |                |                |                         |                |                |                |                |                |                |                |  |
| GO:0004553                   |                       |                |                |                |                |                |                |                |                         |                |                |                |                |                |                |                |  |
| GO:0032559                   |                       |                |                |                |                |                |                |                |                         |                |                |                |                |                |                |                |  |
| GO:0008524                   |                       |                |                |                |                |                |                |                |                         |                |                |                |                |                |                |                |  |
| GO:0003700                   |                       |                |                |                |                |                |                |                |                         |                |                |                |                |                |                |                |  |
| GO:0032553                   |                       |                |                |                |                |                |                |                |                         |                |                |                |                |                |                |                |  |
| GO:0017076                   |                       |                |                |                |                |                |                |                |                         |                |                |                |                |                |                |                |  |
| GO:0032555                   |                       |                |                |                |                |                |                |                |                         |                |                |                |                |                |                |                |  |
| GO:0009055                   |                       |                |                |                |                |                |                |                |                         |                |                |                |                |                |                |                |  |
| GO:0003735                   |                       |                |                |                |                |                |                |                |                         |                |                |                |                |                |                |                |  |
| GO:0005198                   |                       |                |                |                |                |                |                |                |                         |                |                |                |                |                |                |                |  |
| GO:0005038                   |                       |                |                |                |                |                |                |                |                         |                |                |                |                |                |                |                |  |
| GO:0005215                   |                       |                |                |                |                |                |                |                |                         |                |                |                |                |                |                |                |  |
| GO:0020037                   |                       |                |                |                |                |                |                |                |                         |                |                |                |                |                |                |                |  |
| GO:0005506                   |                       |                |                |                |                |                |                |                |                         |                |                |                |                |                |                |                |  |
| GO:0046906                   |                       |                |                |                |                |                |                |                |                         |                |                |                |                |                |                |                |  |
| GO:0003565                   |                       |                |                |                |                |                |                |                |                         |                |                |                |                |                |                |                |  |
| GO:0008037                   |                       |                |                |                |                |                |                |                |                         |                |                |                |                |                |                |                |  |
| GO:0004497                   |                       |                |                |                |                |                |                |                |                         |                |                |                |                |                |                |                |  |
| GO:0001675                   |                       |                |                |                |                |                |                |                |                         |                |                |                |                |                |                |                |  |
| GO:00045735                  |                       |                |                |                |                |                |                |                |                         |                |                |                |                |                |                |                |  |
| GO:0050662                   |                       |                |                |                |                |                |                |                |                         |                |                |                |                |                |                |                |  |
| <b>C. Cell component</b>     |                       |                |                |                |                |                |                |                |                         |                |                |                |                |                |                |                |  |
| GO:0016020                   |                       |                |                |                |                |                |                |                |                         |                |                |                |                |                |                |                |  |
| GO:0032991                   |                       |                |                |                |                |                |                |                |                         |                |                |                |                |                |                |                |  |
| GO:0005623                   |                       |                |                |                |                |                |                |                |                         |                |                |                |                |                |                |                |  |
| GO:0044464                   |                       |                |                |                |                |                |                |                |                         |                |                |                |                |                |                |                |  |
| GO:0044425                   |                       |                |                |                |                |                |                |                |                         |                |                |                |                |                |                |                |  |
| GO:0005840                   |                       |                |                |                |                |                |                |                |                         |                |                |                |                |                |                |                |  |
| GO:0005829                   |                       |                |                |                |                |                |                |                |                         |                |                |                |                |                |                |                |  |
| GO:0032993                   |                       |                |                |                |                |                |                |                |                         |                |                |                |                |                |                |                |  |
| GO:0000786                   |                       |                |                |                |                |                |                |                |                         |                |                |                |                |                |                |                |  |
| GO:0034357                   |                       |                |                |                |                |                |                |                |                         |                |                |                |                |                |                |                |  |
| GO:0009579                   |                       |                |                |                |                |                |                |                |                         |                |                |                |                |                |                |                |  |
| GO:0004234                   |                       |                |                |                |                |                |                |                |                         |                |                |                |                |                |                |                |  |
| GO:0005737                   |                       |                |                |                |                |                |                |                |                         |                |                |                |                |                |                |                |  |
| GO:0044444                   |                       |                |                |                |                |                |                |                |                         |                |                |                |                |                |                |                |  |
| GO:0009521                   |                       |                |                |                |                |                |                |                |                         |                |                |                |                |                |                |                |  |
| GO:0016021                   |                       |                |                |                |                |                |                |                |                         |                |                |                |                |                |                |                |  |
| GO:0031224                   |                       |                |                |                |                |                |                |                |                         |                |                |                |                |                |                |                |  |
| GO:0044424                   |                       |                |                |                |                |                |                |                |                         |                |                |                |                |                |                |                |  |
| GO:0015935                   |                       |                |                |                |                |                |                |                |                         |                |                |                |                |                |                |                |  |
| GO:0005622                   |                       |                |                |                |                |                |                |                |                         |                |                |                |                |                |                |                |  |
| GO:0043239                   |                       |                |                |                |                |                |                |                |                         |                |                |                |                |                |                |                |  |
| GO:0003232                   |                       |                |                |                |                |                |                |                |                         |                |                |                |                |                |                |                |  |
| GO:0009522                   |                       |                |                |                |                |                |                |                |                         |                |                |                |                |                |                |                |  |
| GO:0015934                   |                       |                |                |                |                |                |                |                |                         |                |                |                |                |                |                |                |  |
| GO:0043228                   |                       |                |                |                |                |                |                |                |                         |                |                |                |                |                |                |                |  |
| GO:0033279                   |                       |                |                |                |                |                |                |                |                         |                |                |                |                |                |                |                |  |
| GO:0043226                   |                       |                |                |                |                |                |                |                |                         |                |                |                |                |                |                |                |  |

Fig. S5. Prominent functional categories of genes in the eight tissues detected by Gene ontology enrichment analysis before and 5 days after flowering in two hybrids  
L<sub>0</sub>, Flag leaf; S<sub>0</sub>, Leaf sheath; P<sub>0</sub>, Spikelet; Z<sub>0</sub>, Main panicle axis before flowering; L<sub>5</sub>, Flag leaf; S<sub>5</sub>, Leaf sheath; P<sub>5</sub>, Spikelet; Z<sub>5</sub>, Main panicle axis 5 days after flowering



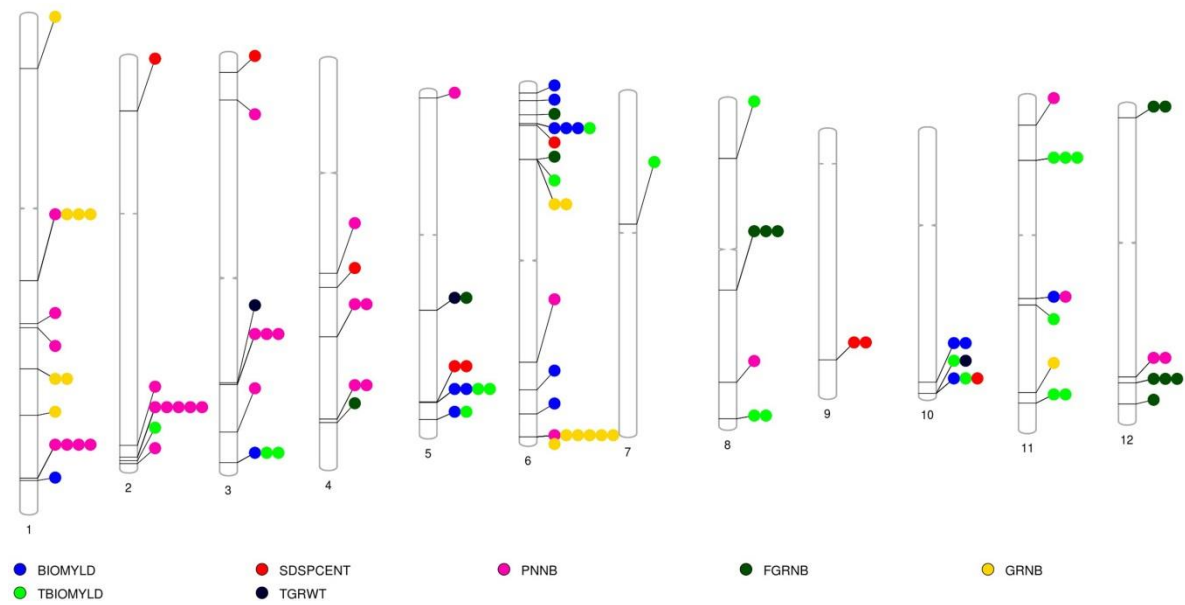

Fig. S6 Distribution of the common seven yield-related QTLs in our two  $F_1$  hybrids, T449  $\times$  H1 [17] and T452  $\times$  H3 [16], compared to the DEGfu-sp-related QTLs detected in the present study. Seven rice yield-related QTLs included biomass yield (TBIOMYLD), biomass yield (BIOMYLD), filled grain number (FGRNB), grain number (GRNB), panicle number (PNNB), seed set percent (SDSPCENT) and 1000-grain weight (TGRWT).



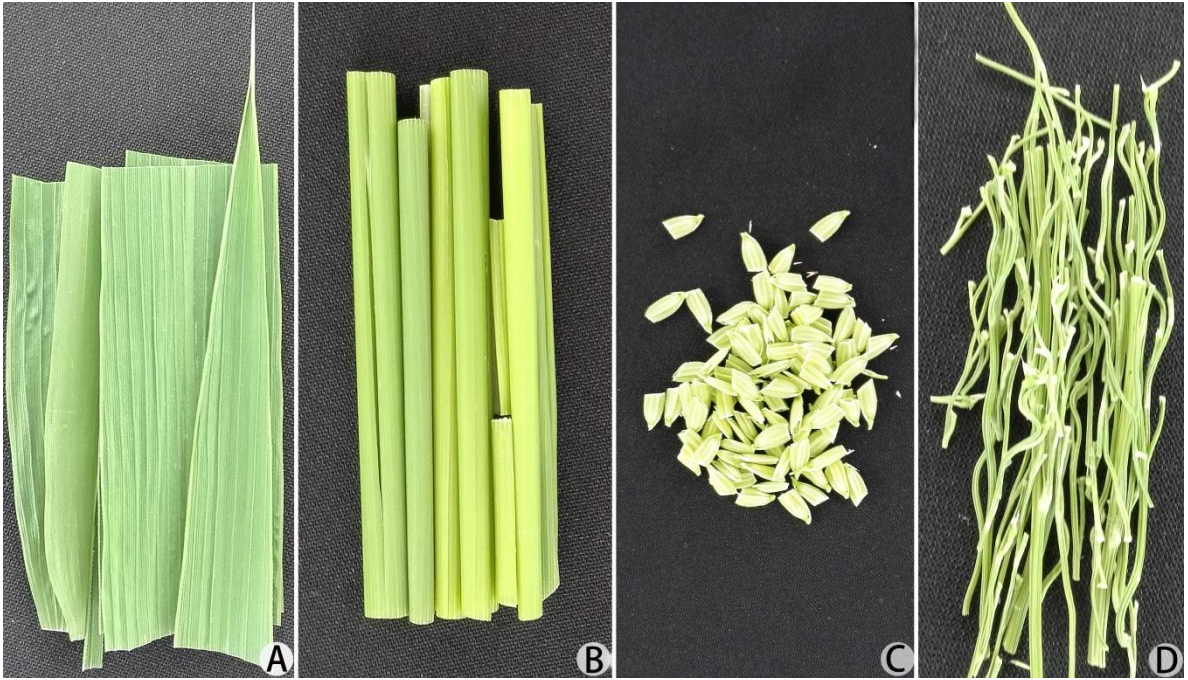

Fig. S8 Samples used for RNA-seq analysis

A. Flag leaf; B. Leaf sheath; C. Spikelets; D. Main panicle axis
